# Supplementary material for: Identification and Pathogenicity of Fusarium Isolated from Soybean in Poland
Source: MDPI journal article supplement (doi:10.3390/pathogens12091162), 2023-09-14
Supplement: s1 [file s1]

Supplementary tables

# Identification and Pathogenicity of *Fusarium* Isolated from Soybean in Poland

Hanna Olszak-Przybyś <sup>1,\*</sup>, Grażyna Korbecka-Glinka <sup>1</sup> and Elżbieta Patkowska <sup>2,\*</sup>

<sup>1</sup> Department of Plant Breeding and Biotechnology, Institute of Soil Science and Plant Cultivation-State Research, ul. Czartoryskich 8, 24-100 Puławy, Poland; gkorbecka@iung.pulawy.pl

<sup>2</sup> Department of Plant Protection, Faculty of Horticulture and Landscape Architecture, University of Life Sciences in Lublin, ul. Leszczyńskiego 7, 20-069 Lublin, Poland

\* Correspondence: holszak@iung.pulawy.pl (H.O.-P.); elzbieta.patkowska@up.lublin.pl (E.P.)

**Table S1.** BLASTn results for translation elongation factor (*TEF1*) gene sequences of each 19 *Fusarium* isolates. For each compared sequence top three highly similar (with the highest percentage of identity) results are provided.

| Accession number | Isolate name | Isolate number | Top three results from BLASTn |                                                                                      |             |                  |         |
|------------------|--------------|----------------|-------------------------------|--------------------------------------------------------------------------------------|-------------|------------------|---------|
|                  |              |                | Accession number              | Accession description                                                                | Query cover | Percent identity | E-value |
| OP985466         | Fr_S1        | 1              | KP964872.1                    | <i>Fusarium redolens</i> isolate NL96, <i>TEF1</i> gene, partial coding sequence     | 100%        | 100.00%          | 0.0     |
|                  |              |                | KP674190.1                    | <i>Fusarium redolens</i> isolate M119, <i>TEF1</i> gene, partial coding sequences    | 100%        | 100.00%          | 0.0     |
|                  |              |                | MW831872.1                    | <i>Fusarium redolens</i> strain BMU 03123, <i>TEF1</i> gene, partial coding sequence | 100%        | 100.00%          | 0.0     |
| OP985467         | Fo_Mv1       | 2              | KP400729.1                    | <i>Fusarium oxysporum</i> isolate Ch13, <i>TEF1</i> gene, partial coding sequence    | 100%        | 100.00%          | 0.0     |
|                  |              |                | KP400726.1                    | <i>Fusarium oxysporum</i> isolate Ch6, <i>TEF1</i> gene, partial coding sequence     | 100%        | 100.00%          | 0.0     |
|                  |              |                | KP400725.1                    | <i>Fusarium oxysporum</i> isolate Ch5A, <i>TEF1</i> gene, partial coding sequence    | 100%        | 100.00%          | 0.0     |
| OP985468         | Fo_At1       | 3              | KP400729.1                    | <i>Fusarium oxysporum</i> isolate Ch13, <i>TEF1</i> gene, partial coding sequence    | 100%        | 99.86%           | 0.0     |
|                  |              |                | KP400726.1                    | <i>Fusarium oxysporum</i> isolate Ch6, <i>TEF1</i> gene, partial coding sequence     | 100%        | 99.86%           | 0.0     |
|                  |              |                | KP400725.1                    | <i>Fusarium oxysporum</i> isolate Ch5A, <i>TEF1</i> gene, partial coding sequence    | 100%        | 99.86%           | 0.0     |
| OP985469         | Fo_Mv3       | 4              | KP964857.1                    | <i>Fusarium oxysporum</i> isolate A13, <i>TEF1</i> gene, partial coding sequence     | 100%        | 100.00%          | 0.0     |
|                  |              |                | OM212398.1                    | <i>Fusarium oxysporum</i> strain VT18, <i>TEF1</i> gene, partial coding sequence     | 100%        | 100.00%          | 0.0     |
|                  |              |                | OM212397.1                    | <i>Fusarium oxysporum</i> strain VT9, <i>TEF1</i> gene, partial coding sequence      | 100%        | 100.00%          | 0.0     |
| OP985470         | Fo_L1        | 5              | KP400729.1                    | <i>Fusarium oxysporum</i> isolate Ch13, <i>TEF1</i> gene, partial coding sequence    | 100%        | 99.86%           | 0.0     |
|                  |              |                | KP400726.1                    | <i>Fusarium oxysporum</i> isolate Ch6, <i>TEF1</i> gene, partial coding sequence     | 100%        | 99.86%           | 0.0     |
|                  |              |                | KP400725.1                    | <i>Fusarium oxysporum</i> isolate Ch5A, <i>TEF1</i> gene, partial coding sequence    | 100%        | 99.86%           | 0.0     |
| OP985471         | Fo_V3        | 6              | KP964857.1                    | <i>Fusarium oxysporum</i> isolate A13, <i>TEF1</i> gene, partial coding sequence     | 100%        | 99.86%           | 0.0     |
|                  |              |                | OM212398.1                    | <i>Fusarium oxysporum</i> strain VT18, <i>TEF1</i> gene, partial coding sequence     | 100%        | 99.86%           | 0.0     |
|                  |              |                | OM212397.1                    | <i>Fusarium oxysporum</i> strain VT9, <i>TEF1</i> gene, partial coding sequence      | 100%        | 99.86%           | 0.0     |

|          |        |    |            |                                                                                         |      |         |     |
|----------|--------|----|------------|-----------------------------------------------------------------------------------------|------|---------|-----|
| OP985472 | Fo_V1  | 7  | KP400729.1 | <i>Fusarium oxysporum</i> isolate Ch13, <i>TEF1</i> gene, partial coding sequence       | 100% | 100.00% | 0.0 |
|          |        |    | KP400726.1 | <i>Fusarium oxysporum</i> isolate Ch6, <i>TEF1</i> gene, partial coding sequence        | 100% | 100.00% | 0.0 |
|          |        |    | KP400725.1 | <i>Fusarium oxysporum</i> isolate Ch5A, <i>TEF1</i> gene, partial coding sequence       | 100% | 100.00% | 0.0 |
| OP985473 | Fo_Md7 | 8  | MT630338.1 | <i>Fusarium oxysporum</i> isolate PG316, <i>TEF1</i> gene, partial coding sequence      | 100% | 99.86%  | 0.0 |
|          |        |    | MT630336.1 | <i>Fusarium oxysporum</i> isolate PG247, <i>TEF1</i> gene, partial coding sequence      | 100% | 99.86%  | 0.0 |
|          |        |    | MT630332.1 | <i>Fusarium oxysporum</i> isolate PG108, <i>TEF1</i> gene, partial coding sequence      | 100% | 99.86%  | 0.0 |
| OP985474 | Fo_An7 | 9  | KP400729.1 | <i>Fusarium oxysporum</i> isolate Ch13, <i>TEF1</i> gene, partial coding sequence       | 100% | 99.86%  | 0.0 |
|          |        |    | KP400726.1 | <i>Fusarium oxysporum</i> isolate Ch6, <i>TEF1</i> gene, partial coding sequence        | 100% | 99.86%  | 0.0 |
|          |        |    | KP400725.1 | <i>Fusarium oxysporum</i> isolate Ch5A, <i>TEF1</i> gene, partial coding sequence       | 100% | 99.86%  | 0.0 |
| OP985475 | Fc_V2  | 10 | MG195126.1 | <i>Fusarium culmorum</i> isolate Lapemi 16, <i>TEF1</i> gene, partial coding sequence   | 100% | 100.00% | 0.0 |
|          |        |    | LT548347.1 | <i>Fusarium culmorum</i> strain IIE24, <i>TEF1</i> gene, partial coding sequence        | 100% | 100.00% | 0.0 |
|          |        |    | LT548337.1 | <i>Fusarium culmorum</i> strain IIA28, <i>TEF1</i> gene, partial coding sequence        | 100% | 100.00% | 0.0 |
| OP985476 | Fc_S1  | 11 | MG195126.1 | <i>Fusarium culmorum</i> isolate Lapemi 16, <i>TEF1</i> gene, partial coding sequence   | 100% | 100.00% | 0.0 |
|          |        |    | LT548347.1 | <i>Fusarium culmorum</i> strain IIE24, <i>TEF1</i> gene, partial coding sequence        | 100% | 100.00% | 0.0 |
|          |        |    | LT548337.1 | <i>Fusarium culmorum</i> , strain IIA28, <i>TEF1</i> gene partial coding sequence       | 100% | 100.00% | 0.0 |
| OP985477 | Fc_At4 | 12 | MG195126.1 | <i>Fusarium culmorum</i> isolate Lapemi 16, <i>TEF1</i> gene, partial coding sequence   | 100% | 100.00% | 0.0 |
|          |        |    | LT548347.1 | <i>Fusarium culmorum</i> strain IIE24, <i>TEF1</i> gene, partial coding sequence        | 100% | 100.00% | 0.0 |
|          |        |    | LT548337.1 | <i>Fusarium culmorum</i> strain IIA28, <i>TEF1</i> gene, partial coding sequence        | 100% | 100.00% | 0.0 |
| OP985478 | Fc_At5 | 13 | MG195126.1 | <i>Fusarium culmorum</i> isolate Lapemi 16, <i>TEF1</i> gene, partial coding sequence   | 100% | 100.00% | 0.0 |
|          |        |    | LT548347.1 | <i>Fusarium culmorum</i> strain IIE24, <i>TEF1</i> gene, partial coding sequence        | 100% | 100.00% | 0.0 |
|          |        |    | LT548337.1 | <i>Fusarium culmorum</i> strain IIA24, <i>TEF1</i> gene, partial coding sequence        | 100% | 100.00% | 0.0 |
| OP985479 | Fg_At7 | 14 | OP105199.1 | <i>Fusarium graminearum</i> isolate JL10-1, <i>TEF1</i> gene, partial coding sequence   | 100% | 100.00% | 0.0 |
|          |        |    | MZ078991.1 | <i>Fusarium graminearum</i> strain 5HS, <i>TEF1</i> gene, partial coding sequence       | 100% | 100.00% | 0.0 |
|          |        |    | MT237780.1 | <i>Fusarium graminearum</i> isolate YNF16-37, <i>TEF1</i> gene, partial coding sequence | 100% | 100.00% | 0.0 |

|          |        |    |            |                                                                                         |      |         |     |
|----------|--------|----|------------|-----------------------------------------------------------------------------------------|------|---------|-----|
| OP985480 | Fg_L7  | 15 | OP105199.1 | <i>Fusarium graminearum</i> isolate JL10-1, <i>TEF1</i> gene, partial coding sequence   | 100% | 100.00% | 0.0 |
|          |        |    | MZ078991.1 | <i>Fusarium graminearum</i> strain 5HS, <i>TEF1</i> gene, partial coding sequence       | 100% | 100.00% | 0.0 |
|          |        |    | MT237780.1 | <i>Fusarium graminearum</i> isolate YNF16-37, <i>TEF1</i> gene, partial coding sequence | 100% | 100.00% | 0.0 |
| OP985481 | Fg_V1  | 16 | OP105199.1 | <i>Fusarium graminearum</i> isolate JL10-1, <i>TEF1</i> gene, partial coding sequence   | 100% | 100.00% | 0.0 |
|          |        |    | MZ078991.1 | <i>Fusarium graminearum</i> strain 5HS, <i>TEF1</i> gene, partial coding sequence       | 100% | 100.00% | 0.0 |
|          |        |    | MT237780.1 | <i>Fusarium graminearum</i> strain IF36, <i>TEF1</i> gene, partial coding sequence      | 100% | 100.00% | 0.0 |
| OP985482 | Fg_L5  | 17 | LT548448.1 | <i>Fusarium graminearum</i> isolate JL10-1, <i>TEF1</i> gene, partial coding sequence   | 100% | 100.00% | 0.0 |
|          |        |    | OP105199.1 | <i>Fusarium graminearum</i> isolate JL10-1, <i>TEF1</i> gene, partial coding sequence   | 100% | 100.00% | 0.0 |
|          |        |    | OK644316.1 | <i>Fusarium graminearum</i> , <i>TEF1</i> gene, partial coding sequence                 | 100% | 100.00% | 0.0 |
| OP986483 | Fg_Md3 | 18 | LT548448.1 | <i>Fusarium graminearum</i> isolate JL10-1, <i>TEF1</i> gene, partial coding sequence   | 100% | 100.00% | 0.0 |
|          |        |    | OP105199.1 | <i>Fusarium graminearum</i> isolate JL10-1, <i>TEF1</i> gene, partial coding sequence   | 100% | 100.00% | 0.0 |
|          |        |    | OK644316.1 | <i>Fusarium graminearum</i> , <i>TEF1</i> gene, partial coding sequence                 | 100% | 100.00% | 0.0 |
| OP985484 | Fg_V7  | 19 | LT548448.1 | <i>Fusarium graminearum</i> isolate JL10-1, <i>TEF1</i> gene, partial coding sequence   | 100% | 100.00% | 0.0 |
|          |        |    | OP105199.1 | <i>Fusarium graminearum</i> isolate JL10-1, <i>TEF1</i> gene, partial coding sequence   | 100% | 100.00% | 0.0 |
|          |        |    | OK644316.1 | <i>Fusarium graminearum</i> , <i>TEF1</i> gene, partial coding sequence                 | 100% | 100.00% | 0.0 |

**Table S2.** BLASTn results for RNA polymerase second largest subunit (*RPB2*) gene sequences of each of the 19 *Fusarium* isolates. For each compared sequence top three highly similar (with the highest percentage of identity) results are provided.

| Accession number | Isolate name | Isolate number | Top three results from BLASTn |                                                                                        |             |                  |         |
|------------------|--------------|----------------|-------------------------------|----------------------------------------------------------------------------------------|-------------|------------------|---------|
|                  |              |                | Accession number              | Accession description                                                                  | Query cover | Percent identity | E-value |
| Fr_S1            | 1            |                | MW832205.1                    | <i>Fusarium redolens</i> strain BMU 03123, <i>RPB2</i> gene, partial coding sequence   | 100%        | 100.00%          | 0.0     |
|                  |              |                | MW091315.1                    | <i>Fusarium redolens</i> isolate NA_FRA01, <i>RPB2</i> gene, partial coding sequence   | 100%        | 100.00%          | 0.0     |
|                  |              |                | GU250699.1                    | <i>Fusarium redolens</i> strain CBS:743.97, <i>RPB2</i> gene, complete coding sequence | 95%         | 100.00%          | 0.0     |
| Fo_Mv1           | 2            |                | MN457541.1                    | <i>Fusarium oxysporum</i> voucher VPRI42888, <i>RPB2</i> gene, partial coding sequence | 100%        | 100.00%          | 0.0     |
|                  |              |                | MN457539.1                    | <i>Fusarium oxysporum</i> voucher VPRI42760, <i>RPB2</i> gene, partial coding sequence | 100%        | 100.00%          | 0.0     |
|                  |              |                | MN457534.1                    | <i>Fusarium oxysporum</i> voucher VPRI42252, <i>RPB2</i> gene, partial coding sequence | 100%        | 100.00%          | 0.0     |
| Fo_At1           | 3            |                | MN457541.1                    | <i>Fusarium oxysporum</i> voucher VPRI42888, <i>RPB2</i> gene, partial coding sequence | 100%        | 100.00%          | 0.0     |
|                  |              |                | MN457539.1                    | <i>Fusarium oxysporum</i> voucher VPRI42760, <i>RPB2</i> gene, partial coding sequence | 100%        | 100.00%          | 0.0     |
|                  |              |                | MN457534.1                    | <i>Fusarium oxysporum</i> voucher VPRI42252, <i>RPB2</i> gene, partial coding sequence | 100%        | 100.00%          | 0.0     |
| Fo_Mv3           | 4            |                | MN457491.1                    | <i>Fusarium oxysporum</i> voucher RGB6505, <i>RPB2</i> gene, partial coding sequence   | 100%        | 100.00%          | 0.0     |
|                  |              |                | MN457542.1                    | <i>Fusarium oxysporum</i> voucher VPRI42889, <i>RPB2</i> gene, partial coding sequence | 100%        | 99.69%           | 0.0     |
|                  |              |                | MN457532.1                    | <i>Fusarium oxysporum</i> voucher VPRI42190, <i>RPB2</i> gene, partial coding sequence | 100%        | 99.69%           | 0.0     |
| Fo_L1            | 5            |                | MN457541.1                    | <i>Fusarium oxysporum</i> voucher VPRI42888, <i>RPB2</i> gene, partial coding sequence | 100%        | 100.00%          | 0.0     |
|                  |              |                | MN457539.1                    | <i>Fusarium oxysporum</i> voucher VPRI42760, <i>RPB2</i> gene, partial coding sequence | 100%        | 100.00%          | 0.0     |
|                  |              |                | MN457534.1                    | <i>Fusarium oxysporum</i> voucher VPRI42252, <i>RPB2</i> gene, partial coding sequence | 100%        | 100.00%          | 0.0     |
| Fo_V3            | 6            |                | MN457491.1                    | <i>Fusarium oxysporum</i> voucher RG6505, <i>RPB2</i> gene, partial coding sequence    | 100%        | 100.00%          | 0.0     |
|                  |              |                | MN457542.1                    | <i>Fusarium oxysporum</i> voucher VPRI42889, <i>RPB2</i> gene, partial coding sequence | 100%        | 99.69%           | 0.0     |
|                  |              |                | MN457532.1                    | <i>Fusarium oxysporum</i> voucher VPRI42190, <i>RPB2</i> gene, partial coding sequence | 100%        | 99.69%           | 0.0     |
| Fo_V1            | 7            |                | MN457541.1                    | <i>Fusarium oxysporum</i> voucher VPRI42888, <i>RPB2</i> gene, partial coding sequence | 100%        | 100.00%          | 0.0     |
|                  |              |                | MN457539.1                    | <i>Fusarium oxysporum</i> voucher VPRI42760, <i>RPB2</i> gene, partial coding sequence | 100%        | 100.00%          | 0.0     |

|        |    |            |                                                                                          |      |         |     |
|--------|----|------------|------------------------------------------------------------------------------------------|------|---------|-----|
|        |    | MN457534.1 | <i>Fusarium oxysporum</i> voucher VPRI42252, <i>RPB2</i> gene, partial coding sequence   | 100% | 100.00% | 0.0 |
|        |    | MN457541.1 | <i>Fusarium oxysporum</i> voucher VPRI42888, <i>RPB2</i> gene, partial coding sequence   | 100% | 100.00% | 0.0 |
| Fo_Md7 | 8  | MN457539.1 | <i>Fusarium oxysporum</i> voucher VPRI42760, <i>RPB2</i> gene, partial coding sequence   | 100% | 100.00% | 0.0 |
|        |    | MN457534.1 | <i>Fusarium oxysporum</i> voucher VPRI42252, <i>RPB2</i> gene, partial coding sequence   | 100% | 100.00% | 0.0 |
|        |    | MN457541.1 | <i>Fusarium oxysporum</i> voucher VPRI42888, <i>RPB2</i> gene, partial coding sequence   | 100% | 100.00% | 0.0 |
| Fo_An7 | 9  | MN457539.1 | <i>Fusarium oxysporum</i> voucher VPRI42760, <i>RPB2</i> gene, partial coding sequence   | 100% | 100.00% | 0.0 |
|        |    | MN457534.1 | <i>Fusarium oxysporum</i> voucher VPRI42252, <i>RPB2</i> gene, partial coding sequence   | 100% | 100.00% | 0.0 |
|        |    | GQ915490.1 | <i>Fusarium culmorum</i> strain FRC R-09618, <i>RPB2</i> gene, partial coding sequence   | 100% | 100.00% | 0.0 |
| Fc_V2  | 10 | MT997139.1 | <i>Fusarium culmorum</i> isolate M62A, <i>RPB2</i> gene, partial coding sequence         | 98%  | 100.00% | 0.0 |
|        |    | MH582079.1 | <i>Fusarium culmorum</i> strain MRC 1371, <i>RPB2</i> gene, partial coding sequence      | 98%  | 100.00% | 0.0 |
|        |    | GQ915490.1 | <i>Fusarium culmorum</i> strain FRC R-09618, <i>RPB2</i> gene, partial coding sequence   | 100% | 100.00% | 0.0 |
| Fc_S1  | 11 | MT997139.1 | <i>Fusarium culmorum</i> isolate M62A, <i>RPB2</i> gene, partial coding sequence         | 100% | 100.00% | 0.0 |
|        |    | MH582079.1 | <i>Fusarium culmorum</i> strain MRC 1371, <i>RPB2</i> gene, partial coding sequence      | 98%  | 100.00% | 0.0 |
|        |    | GQ915490.1 | <i>Fusarium culmorum</i> strain FRC R-09618, <i>RPB2</i> gene, partial coding sequence   | 100% | 100.00% | 0.0 |
| Fc_At4 | 12 | MT997139.1 | <i>Fusarium culmorum</i> isolate M62A, <i>RPB2</i> gene, partial coding sequence         | 98%  | 100.00% | 0.0 |
|        |    | MH582079.1 | <i>Fusarium culmorum</i> strain MRC 1371, <i>RPB2</i> gene, partial coding sequence      | 98%  | 100.00% | 0.0 |
|        |    | GQ915490.1 | <i>Fusarium culmorum</i> strain FRC R-09618, <i>RPB2</i> gene, partial coding sequence   | 100% | 100.00% | 0.0 |
| Fc_At5 | 13 | MT997139.1 | <i>Fusarium culmorum</i> isolate M62A, <i>RPB2</i> gene, partial coding sequence         | 98%  | 100.00% | 0.0 |
|        |    | MH582079.1 | <i>Fusarium culmorum</i> strain FRC R-09618, <i>RPB2</i> gene, partial coding sequence   | 98%  | 100.00% | 0.0 |
|        |    | MH582179.1 | <i>Fusarium graminearum</i> strain MRC 2563, <i>RPB2</i> gene, partial coding sequence   | 98%  | 100.00% | 0.0 |
| Fg_At7 | 14 | KT855207.1 | <i>Fusarium graminearum</i> strain CBS 123688, <i>RPB2</i> gene, partial coding sequence | 94%  | 100.00% | 0.0 |
|        |    | MN892317.1 | <i>Fusarium graminearum</i> strain A2s4, <i>RPB2</i> gene, partial coding sequence       | 98%  | 100.00% | 0.0 |
|        |    | MH582179.1 | <i>Fusarium graminearum</i> strain MRC 2563, <i>RPB2</i> gene, partial coding sequence   | 98%  | 100.00% | 0.0 |
| Fg_L7  | 15 | KT855207.1 | <i>Fusarium graminearum</i> strain CBS 123688, <i>RPB2</i> gene, partial coding sequence | 94%  | 100.00% | 0.0 |

|        |    |            |                                                                                          |     |         |     |
|--------|----|------------|------------------------------------------------------------------------------------------|-----|---------|-----|
| Fg_V1  | 16 | MN892317.1 | <i>Fusarium graminearum</i> strain A2s4, <i>RPB2</i> gene, partial coding sequence       | 98% | 100.00% | 0.0 |
|        |    | MH582179.1 | <i>Fusarium graminearum</i> strain MRC 2563, <i>RPB2</i> gene, partial coding sequence   | 98% | 100.00% | 0.0 |
|        |    | KT855207.1 | <i>Fusarium graminearum</i> strain CBS 123688, <i>RPB2</i> gene, partial coding sequence | 94% | 100.00% | 0.0 |
|        |    | MN892317.1 | <i>Fusarium graminearum</i> strain A2s4, <i>RPB2</i> gene, partial coding sequence       | 98% | 100.00% | 0.0 |
| Fg_L5  | 17 | MH582179.1 | <i>Fusarium graminearum</i> strain MRC 2563, <i>RPB2</i> gene, partial coding sequence   | 98% | 100.00% | 0.0 |
|        |    | KT855207.1 | <i>Fusarium graminearum</i> strain CBS 123688, <i>RPB2</i> gene, partial coding sequence | 94% | 100.00% | 0.0 |
|        |    | MN892317.1 | <i>Fusarium graminearum</i> strain A2s4, <i>RPB2</i> gene, partial coding sequence       | 98% | 100.00% | 0.0 |
| Fg_Md3 | 18 | MH582179.1 | <i>Fusarium graminearum</i> strain MRC 2563, <i>RPB2</i> gene, partial coding sequence   | 98% | 100.00% | 0.0 |
|        |    | KT855207.1 | <i>Fusarium graminearum</i> strain CBS 123688, <i>RPB2</i> gene, partial coding sequence | 94% | 100.00% | 0.0 |
|        |    | MN892317.1 | <i>Fusarium graminearum</i> strain A2s4, <i>RPB2</i> gene, partial coding sequence       | 98% | 99.79%  | 0.0 |
| Fg_V7  | 19 | MH582179.1 | <i>Fusarium graminearum</i> strain MRC 2563, <i>RPB2</i> gene, partial coding sequence   | 98% | 100.00% | 0.0 |
|        |    | KT855207.1 | <i>Fusarium graminearum</i> strain CBS 123688, <i>RPB2</i> gene, partial coding sequence | 94% | 100.00% | 0.0 |
|        |    | MN892317.1 | <i>Fusarium graminearum</i> strain A2s4, <i>RPB2</i> gene, partial coding sequence       | 98% | 99.79%  | 0.0 |

**Table S3.** Details on the origin of the reference *Fusarium* spp. isolates (including the species, isolate name, source and country of isolation) and the GenBank accession numbers of their *TEF1* and *RPB2* sequences included in phylogenetic analysis (see Figure 2).

| Species                     | Strain/Isolate name | Isolation source | Country of isolation | GenBank Accession Number |             |
|-----------------------------|---------------------|------------------|----------------------|--------------------------|-------------|
|                             |                     |                  |                      | <i>TEF1</i>              | <i>RPB2</i> |
| <i>Fusarium culmorum</i>    | NRRL 25475          | barley           | Denmark              | KY873384                 | MW233425    |
| <i>Fusarium culmorum</i>    | MRC 1787            | unknown          | Canada               | MH582254                 | MH582106    |
| <i>Fusarium culmorum</i>    | MRC 2197            | potato           | Germany              | MH582257                 | MH582139    |
| <i>Fusarium culmorum</i>    | MRC 1890            | barley           | Germany              | MH582256                 | MH582109    |
| <i>Fusarium culmorum</i>    | MRC939              | corn             | Australia            | MH582258                 | MH582222    |
| <i>Fusarium culmorum</i>    | MRC 1889            | barley           | Germany              | MH582255                 | MH582108    |
| <i>Fusarium culmorum</i>    | M62A                | wood             | China                | MT661593                 | MT997139    |
| <i>Fusarium culmorum</i>    | CBS 139512          | weat             | Poland               | KT855186                 | KT855212    |
| <i>Fusarium graminearum</i> | CBS 123688          | oat              | Sweden               | KT855181                 | KT855207    |
| <i>Fusarium graminearum</i> | MRC 3082            | feed             | Germany              | MH 582244                | MH582207    |
| <i>Fusarium graminearum</i> | A2s4                | soybean          | China                | MK560307                 | MN892317    |
| <i>Fusarium graminearum</i> | A1s4                | soybean          | China                | MK560306                 | MN892318    |
| <i>Fusarium graminearum</i> | NL19-100008         | soil             | The Netherlands      | MZ921906                 | MZ921775    |
| <i>Fusarium graminearum</i> | MRC 3081            | feed             | Germany              | MH582243                 | MH582206    |
| <i>Fusarium graminearum</i> | MRC 2940            | millet           | Hungary              | MH582242                 | MH582205    |
| <i>Fusarium graminearum</i> | CBS 136009          | barley           | Germany              | MW928838                 | MW928826    |
| <i>Fusarium graminearum</i> | NRRL 31084          | maize            | USA                  | MW233103                 | MW233447    |
| <i>Fusarium graminearum</i> | SYS 145             | maize            | China                | OM985204                 | OP435990    |
| <i>Fusarium graminearum</i> | SYS 144             | maize            | China                | OM985203                 | OP435989    |
| <i>Fusarium oxysporum</i>   | B3s6                | soybean          | China                | MK560296                 | MN892310    |
| <i>Fusarium oxysporum</i>   | NRRL 62545          | human            | USA                  | KR673926                 | KR674016    |
| <i>Fusarium oxysporum</i>   | NRRL 54996          | penguin          | USA                  | KC808227                 | KC808366    |
| <i>Fusarium oxysporum</i>   | NRRL 62547          | dog              | USA                  | KC808224                 | KC808367    |
| <i>Fusarium oxysporum</i>   | NRRL 25387          | human            | USA                  | HM347117                 | HM347209    |
| <i>Fusarium oxysporum</i>   | B5s2                | soybean          | China                | MK560297                 | MN892309    |
| <i>Fusarium oxysporum</i>   | B2s3                | soybean          | China                | MK560294                 | MN892312    |
| <i>Fusarium oxysporum</i>   | B2s1                | soybean          | China                | MK560293                 | MN892313    |
| <i>Fusarium oxysporum</i>   | A7r1                | soybean          | China                | MK560302                 | MN892305    |
| <i>Fusarium oxysporum</i>   | A6s3                | soybean          | China                | MK560301                 | MN892306    |
| <i>Fusarium redolens</i>    | NRRL 25600          | needle grass     | Tunisia              | MT409453                 | MT409443    |
| <i>Fusarium redolens</i>    | NRRL 22901          | Needle grass     | Tunisia              | MT409452                 | MT409442    |
| <i>Fusarium redolens</i>    | NRRL 54967          | cat              | USA                  | KC808221                 | KC808363    |
| <i>Fusarium solani</i>      | NRRL 43474          | human            | USA                  | EF452945                 | EF469984    |
| <i>Fusarium solani</i>      | GJS 09-1466 T       | potato           | Slovenia             | KT313611                 | KT313623    |
